# Supplementary material
Source: publisher figshare collection journal article supplement (https://diabetesjournals.figshare.com/ndownloader/files/30443781)
Supplement: Supplementary file 1 [file 30443781]

## **Supplementary Information**

### **Hepatocytic activating transcription factor 3 protects against steatohepatitis via hepatocyte nuclear factor 4 $\alpha$**

Yanyong Xu, Shuwei Hu, Kavita Jadhav, Yingdong Zhu, Xiaoli Pan, Fathima Cassim  
Bawa, Liya Yin, and Yanqiao Zhang

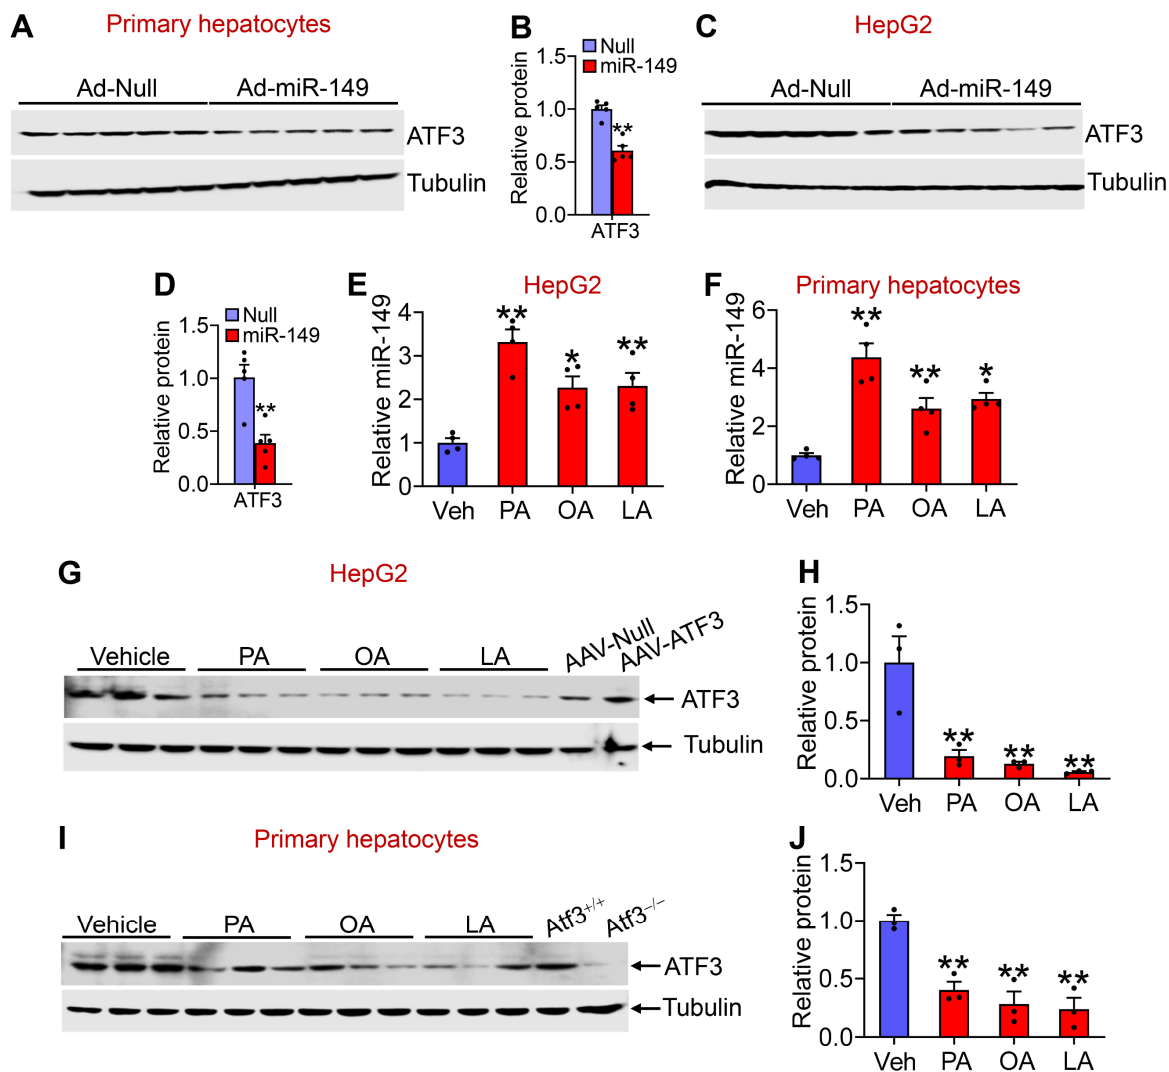

**Figure S1. MiR-149 inhibits ATF3 expression and is induced by free fatty acids**

**A-D:** Mouse primary hepatocytes (A, B) or HepG2 cells (C, D) were infected with Ad-Empty or Ad-miR-149 for 24 h. Western blot assays (A, C) were performed and data were quantified (B, D) (n=5).

**E and F:** HepG2 cells (E) or mouse primary hepatocytes (F) were treated with either vehicle or 300  $\mu$ M palmitic acid (PA), oleic acid (OA) or linoleic acid (LA) for 24 h (n=4), and miR-149 levels were determined.

**G-J:** HepG2 cells (G, H) or mouse primary hepatocytes (I, J) were treated with either vehicle or 300  $\mu$ M PA, OA or LA for 24 h (n=3). Western blot assays were performed (G, I) and data were quantified (H, J). In (G), liver lysates from mice infected with AAV8-ALB-Null or AAV8-ALB-hATF3 were used for positive controls. In (I), liver lysates from *Atf3*<sup>+/+</sup> or *Atf3*<sup>-/-</sup> mice were used for a positive control.

All values are expressed as mean $\pm$ SEM. \**P*<0.05, \*\**P*<0.01 versus the control or vehicle group

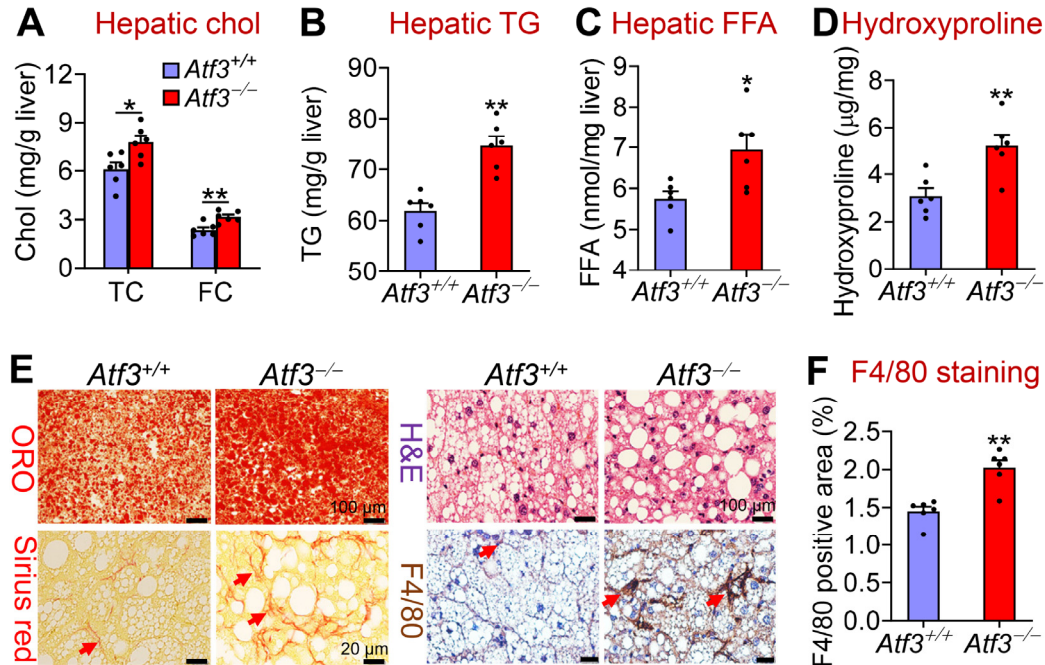

**Figure S2. HFCF diet-fed *Atf3*<sup>-/-</sup> mice have increased inflammation in the liver**

**A-F:** *Atf3*<sup>+/+</sup> mice and *Atf3*<sup>-/-</sup> mice were fed an HFCF diet for 20 weeks (n=6). Hepatic levels of total cholesterol (TC), free cholesterol (FC) (A), triglycerides (TG) (B), free fatty acids (FFAs) (C), and hydroxyproline (D) were quantified. Liver sections were stained with Oil Red O (ORO) (E, left top panel), hematoxylin and eosin (H&E) (E, right top panel) or picrosirius red (E, left bottom panel), or immunohistochemically stained with an F4/80 antibody (E, right bottom panel). F4/80 staining-positive areas were quantified (F). In (E), arrows point to fibrosis (left bottom panel) or macrophages (right bottom panel). All values are expressed as mean±SEM. \**P*<0.05, \*\**P*<0.01

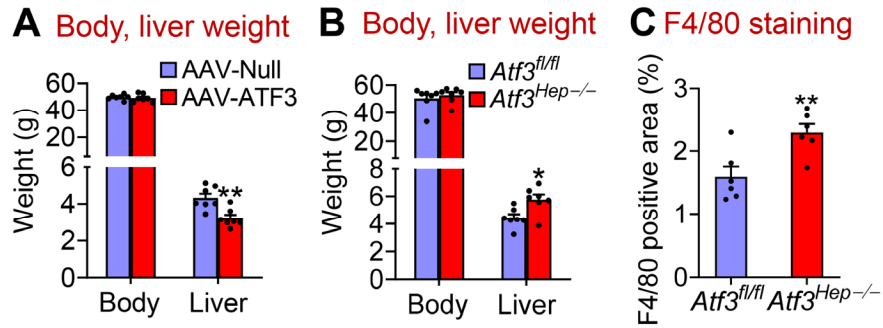

**Figure S3. Hepatocytic ATF3 regulates liver weight and inflammation in HFCF diet-fed mice**

**A:** C57BL/6J mice were i.v. injected with AAV8-ALB-Null or AAV8-ALB-ATF3 and then fed an HFCF diet for 16 weeks (n=7). Body weight and liver weight were measured.

**B and C:** *Atf3<sup>fl/fl</sup>* mice and *Atf3<sup>Hep-/-</sup>* mice were fed an HFCF diet for 16 weeks (n=7). Liver and body weight was measured (B). F4/80 staining-positive areas (%) of liver sections were quantified (C).

All values are expressed as mean±SEM. \**P*<0.05, \*\**P*<0.01

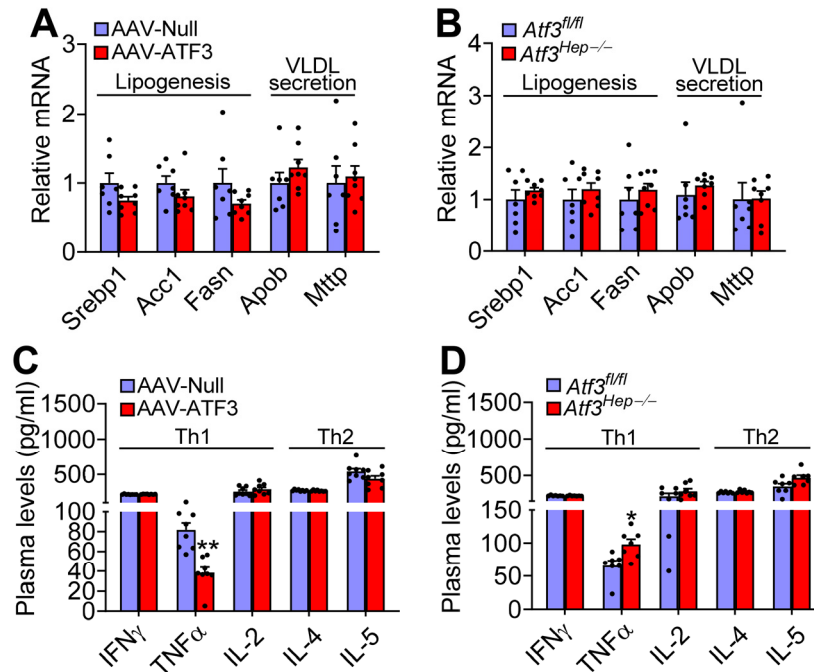

**Figure S4. Effect of over-expression or loss of hepatocytic ATF3 on hepatic gene expression or plasma cytokine levels**

**A** and **C**: C57BL/6J mice were i.v. injected with either AAV8-ALB-Null or AAV8-ALB-ATF3 and then fed an HFCF diet for 16 weeks (n=7). Hepatic mRNA levels were determined (A) and plasma Th1- or Th2-type cytokine levels were quantified (C).

**B** and **D**: *Atf3<sup>fl/fl</sup>* mice and *Atf3<sup>Hep-/-</sup>* mice were fed an HFCF diet for 16 weeks (n=7). Hepatic mRNA levels were determined (B) and plasma Th1- or Th2-type cytokine levels were quantified (D).

*Acc1*, acetyl-coA carboxylase 1. *Apob*, apolipoprotein b. *Fasn*, fatty acid synthase. *IFN $\gamma$* , interferon  $\gamma$ . *IL-2*, interleukin 2. *Mttp*, microsomal triglyceride transfer protein. *Srebp1*, sterol regulatory element-binding protein 1. *TNF $\alpha$* , tumor necrosis factor  $\alpha$ .

All values are expressed as mean $\pm$ SEM. \* $P$ <0.05, \*\* $P$ <0.01
